# Supplementary material for: TssA forms a gp6‐like ring attached to the type VI secretion sheath
Source: PubMed Central journal article supplement (PMC4969574; doi:10.15252/embj.201694024), 2016-06-10
Supplement: EMBJ-35-1613-s001.pdf [file EMBJ-35-1613-s001.pdf]

## Appendix

### TssA forms a gp6-like ring attached to the type VI secretion sheath

Sara Planamente<sup>1</sup>, Osman Salih<sup>2</sup>, Eleni Manoli<sup>1</sup>, David Albesa-Jové<sup>3</sup>, Paul S. Freemont<sup>2,\*</sup> &  
Alain Filloux<sup>1,\*\*</sup>

<sup>1</sup>MRC Centre for Molecular Bacteriology and Infection (CMBI), Department of Life Sciences,  
Imperial College London, London SW7 2AZ, United Kingdom.

<sup>2</sup>Section of Structural Biology, Department of Medicine, Imperial College London, London SW7  
2AZ, United Kingdom.

<sup>3</sup>Unidad de Biofísica, Consejo Superior de Investigaciones Científicas - Universidad del País  
Vasco/Euskal Herriko Unibertsitatea (CSIC-UPV/EHU), Departamento de Bioquímica, Universidad  
del País Vasco, 48940 Leioa, Bizkaia (Spain), and Structural Biology Unit, CIC bioGUNE, Bizkaia  
Technology Park, 48160 Derio (Spain).

#### Appendix table of content

Appendix Table S1 and S2

Appendix Figure S1 and S2

**Appendix Table S1. Strains used in this study**

| Strains                                                                                            | Description                                                                                                                                                                                                                   | References            |
|----------------------------------------------------------------------------------------------------|-------------------------------------------------------------------------------------------------------------------------------------------------------------------------------------------------------------------------------|-----------------------|
| <i>E. coli</i>                                                                                     |                                                                                                                                                                                                                               |                       |
| One-shot top10                                                                                     | F <sup>-</sup> <i>mcrA</i> $\Delta$ ( <i>mrr-hsdRMS-mcrBC</i> ) $\phi$ 80 <i>lacZ</i> $\Delta$ M15 $\Delta$ <i>lacX74</i> <i>recA1</i> <i>araD139</i> $\Delta$ ( <i>ara-leu</i> )                                             | Invitrogen            |
| B834(DE3)                                                                                          | F <sup>-</sup> <i>ompT</i> <i>hsdSB</i> (rB <sup>-</sup> mB <sup>-</sup> ) <i>gal dcm met</i> (DE3)                                                                                                                           | Laboratory collection |
| DHM1                                                                                               | <i>cya-854</i> <i>recA1</i> <i>gyrA96</i> (NaI) <i>thi1</i> <i>hsdR17</i> <i>spoT1</i> <i>rfbD1</i> <i>glnV44</i> (AS)                                                                                                        | Karimova et al., 1998 |
| C118 $\lambda$ pir                                                                                 | Host strain for pKNG101 replication; D ( <i>ara-leu</i> ) <i>araD</i> <i>DlacX74</i> <i>galE</i> <i>galK-phoA20</i> <i>thi-1</i> <i>rpsE</i> <i>rpoB</i> <i>argE</i> (Am) <i>recA1</i> <i>Rf</i> <sup>*</sup> ( <i>lpir</i> ) | Herrero et al., 1990  |
| <i>P. aeruginosa</i>                                                                               |                                                                                                                                                                                                                               |                       |
| PAK $\Delta$ <i>retS</i>                                                                           | In-frame deletion of <i>retS</i> (PA4856) in <i>P. aeruginosa</i> PAK wild-type strain                                                                                                                                        | Goodman et al., 2004  |
| PAK $\Delta$ <i>retS</i> -pBBR                                                                     | PAK $\Delta$ <i>retS</i> strain carrying the empty vector pBBR1MCS-4                                                                                                                                                          | This study            |
| PAK $\Delta$ <i>retS</i> $\Delta$ <i>AI</i>                                                        | In-frame deletion of <i>tssAI</i> (PA0082) in PAK $\Delta$ <i>retS</i>                                                                                                                                                        | This study            |
| PAK $\Delta$ <i>retS</i> $\Delta$ <i>AI</i> -pBBR                                                  | PAK $\Delta$ <i>retS</i> $\Delta$ <i>AI</i> mutant carrying the empty vector pBBR1MCS-4                                                                                                                                       | This study            |
| PAK $\Delta$ <i>retS</i> $\Delta$ <i>AI</i> -pBBR- <i>AI</i>                                       | PAK $\Delta$ <i>retS</i> $\Delta$ <i>AI</i> mutant carrying the pBBR1MCS-4 vector expressing <i>tssAI</i> (pBBR- <i>AI</i> )                                                                                                  | This study            |
| PAK $\Delta$ <i>retS</i> $\Delta$ <i>AI</i> -pBBR- <i>His<sub>6</sub>AI</i>                        | PAK $\Delta$ <i>retS</i> $\Delta$ <i>AI</i> mutant carrying the pBBR1MCS-4 vector expressing the N-terminally His <sub>6</sub> tagged <i>tssAI</i> (pBBR- <i>His<sub>6</sub>AI</i> )                                          | This study            |
| PAK $\Delta$ <i>retS</i> $\Delta$ <i>E1</i>                                                        | In-frame deletion of <i>tssE1</i> (PA0087) in PAK $\Delta$ <i>retS</i>                                                                                                                                                        | Lossi et al., 2011    |
| PAK $\Delta$ <i>retS</i> $\Delta$ <i>E1</i> -pBBR                                                  | PAK $\Delta$ <i>retS</i> $\Delta$ <i>E1</i> mutant carrying the empty vector pBBR1MCS-4                                                                                                                                       |                       |
| PAK $\Delta$ <i>retS</i> $\Delta$ <i>E1</i> -pBBR- <i>E1</i>                                       | PAK $\Delta$ <i>retS</i> $\Delta$ <i>E1</i> mutant carrying the pBBR1MCS-4 vector expressing <i>tssE1</i> (pBBR- <i>E1</i> )                                                                                                  | This study            |
| PAK $\Delta$ <i>retS</i> $\Delta$ <i>B1</i> :: <i>B1-sfGFP</i>                                     | PAK $\Delta$ <i>retS</i> $\Delta$ <i>B1</i> strain having the gene encoding the C-terminal fusion of the sfGFP with <i>tssB1</i> ( <i>B1-sfGFP</i> ) under a plac promoter integrated into the <i>att</i> site                | This study            |
| PAK $\Delta$ <i>retS</i> $\Delta$ <i>AI</i> $\Delta$ <i>B1</i> :: <i>B1-sfGFP</i>                  | PAK $\Delta$ <i>retS</i> $\Delta$ <i>AI</i> $\Delta$ <i>B1</i> strain having the gene encoding the <i>B1-sfGFP</i> under a plac promoter integrated into the <i>att</i> site.                                                 | This study            |
| PAK $\Delta$ <i>retS</i> $\Delta$ <i>B1</i> $\Delta$ <i>E1</i> :: <i>B1-sfGFP</i>                  | PAK $\Delta$ <i>retS</i> $\Delta$ <i>B1</i> $\Delta$ <i>E1</i> strain having the gene encoding the <i>B1-sfGFP</i> under a plac promoter integrated into the <i>att</i> site                                                  | This study            |
| PAK $\Delta$ <i>retS</i> $\Delta$ <i>AI</i> $\Delta$ <i>B1</i> :: <i>B1-sfGFP</i> -pBBR- <i>AI</i> | PAK $\Delta$ <i>retS</i> $\Delta$ <i>AI</i> $\Delta$ <i>B1</i> :: <i>B1-sfGFP</i> carrying the pBBR1MCS-4 vector expressing <i>tssAI</i> (pBBR- <i>AI</i> )                                                                   | This study            |
| PAK $\Delta$ <i>retS</i> $\Delta$ <i>B1</i> $\Delta$ <i>E1</i> :: <i>B1-sfGFP</i> -pBBR- <i>E1</i> | PAK $\Delta$ <i>retS</i> $\Delta$ <i>B1</i> $\Delta$ <i>E1</i> :: <i>B1-sfGFP</i> carrying the pBBR1MCS-4 vector expressing <i>tssE1</i> (pBBR- <i>E1</i> )                                                                   | This study            |

**Appendix Table S2. Plasmids used in this study**

| Plasmids                       | Description                                                                                                                                                          | References            |
|--------------------------------|----------------------------------------------------------------------------------------------------------------------------------------------------------------------|-----------------------|
| pKNG101- $\Delta$ <i>AI</i>    | pKNG101 containing the mutator fragment for deletion of <i>tssAI</i> , Str <sup>R</sup>                                                                              | This study            |
| Mini-CTX- <i>B1-sfGFP</i>      | Mini-CTX-1 encoding <i>tssB1-sfGFP</i> under a <i>plac</i> promoter for integration into the <i>att</i> site of the <i>P. aeruginosa</i> chromosome, Tc <sup>R</sup> | This study            |
| pBBR                           | pBBR1MCS-4, Broad host range vector pBBR1 replicon, Ap <sup>R</sup>                                                                                                  | Kovach et al., 1995   |
| pBBR- <i>AI</i>                | pBBR1MCS-4 containing <i>tssAI</i>                                                                                                                                   | This study            |
| pBBR- <i>His<sub>6</sub>AI</i> | pBBR1MCS-4 containing <i>His<sub>6</sub>tssAI</i>                                                                                                                    | This study            |
| pBBR- <i>EI</i>                | pBBR1MCS-4 containing <i>tssEI</i>                                                                                                                                   | This study            |
| pET28                          | Expression vector used for expression of N-terminal His <sub>6</sub> tagged proteins, Km <sup>R</sup>                                                                | Novagen               |
| pET26                          | Expression vector used for expression of untagged proteins, Km <sup>R</sup>                                                                                          | Novagen               |
| pACYC                          | pACYC-Duet vector, Cm <sup>R</sup>                                                                                                                                   | Novagen               |
| pET- <i>His<sub>6</sub>AI</i>  | pET28 expressing TssA1 with an N-terminal His <sub>6</sub> tag (His <sub>6</sub> -TssA1)                                                                             | This study            |
| pET26- <i>B1C1</i>             | pET26 expressing untagged TssB1C1                                                                                                                                    | This study            |
| pACYC- <i>AI-B1C1</i>          | pACYC-Duet-1 expressing His <sub>6</sub> -tagged TssA1 and TssB1C1 without tag from two separate T7 promoters                                                        | This study            |
| pKT25                          | BTH vector for fusion of target proteins to <i>B. pertussis cya</i> gene T25 fragment; P <sub>lac</sub> :: <i>cya</i> <sup>1-675</sup> p15ori, Km <sup>R</sup>       | Karimova et al., 1998 |
| pUT18C                         | BTH vector for fusion of target proteins to <i>B. pertussis cya</i> gene T18 fragment; P <sub>lac</sub> :: <i>cya</i> <sup>675-1197</sup> pUCori, Ap <sup>R</sup>    | Karimova et al., 1998 |
| pKT25- <i>AI</i>               | Fusion of <i>tssAI</i> to <i>cya</i> gene T25 fragment in pKT25, Km <sup>R</sup>                                                                                     | Lossi et al., 2012    |
| pUT18C- <i>AI</i>              | Fusion of <i>tssAI</i> to <i>cya</i> gene T18 fragment in pUT18C, Ap <sup>R</sup>                                                                                    | This study            |
| pUT18C- <i>Hcp1</i>            | Fusion of <i>hcp1</i> to <i>cya</i> gene T18 fragment in pUT18C, Ap <sup>R</sup>                                                                                     | This study            |
| pUT18C- <i>EI</i>              | Fusion of <i>tssEI</i> to <i>cya</i> gene T18 fragment in pUT18C, Ap <sup>R</sup>                                                                                    | Lossi et al., 2012    |
| pUT18C- <i>F1</i>              | Fusion of <i>tssF1</i> to <i>cya</i> gene T18 fragment in pUT18C, Ap <sup>R</sup>                                                                                    | Lossi et al., 2012    |
| pUT18C- <i>G1</i>              | Fusion of <i>tssG1</i> to <i>cya</i> gene T18 fragment in pUT18C, Ap <sup>R</sup>                                                                                    | Lossi et al., 2012    |
| pUT18C- <i>K1</i>              | Fusion of <i>tssK1</i> to <i>cya</i> gene T18 fragment in pUT18C, Ap <sup>R</sup>                                                                                    | This study            |
| pUT18C- <i>VgrG1a</i>          | Fusion of <i>vgrG1a</i> to <i>cya</i> gene T18 fragment in pUT18C, Ap <sup>R</sup>                                                                                   | This study            |
| pUT18C- <i>ClpV1</i>           | Fusion of <i>ClpV1</i> to <i>cya</i> gene T18 fragment in pUT18C, Ap <sup>R</sup>                                                                                    | Förster et al., 2014  |

Ap<sup>R</sup>, ampicillin-resistant; Cm<sup>R</sup>, chloramphenicol-resistant; Km<sup>R</sup>, kanamycin-resistant; Str<sup>R</sup>, streptomycin-resistant; Tc<sup>R</sup>, tetracyclin-resistant.

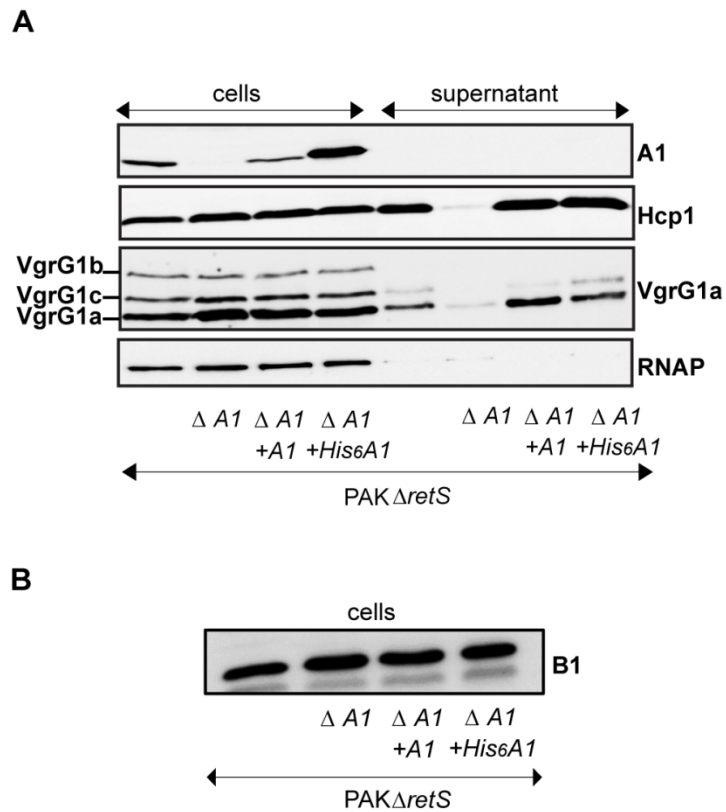

**Appendix Figure S1. The N-terminally His<sub>6</sub>-tagged TssA1 is functional. A.** Proteins from whole cell extracts and culture supernatants of PAK $\Delta$ *retS*, the derivative *tssA1* mutant ( $\Delta$ *A1*) (both carrying the pBBR plasmid) and the complemented  $\Delta$ *A1* mutant carrying pBBR-*tssA1* ( $\Delta$ *A1*+*A1*) or pBBR-*His<sub>6</sub>-tssA1*( $\Delta$ *A1*+His<sub>6</sub>*A1*) were analysed by Western blotting. Polyclonal antibodies directed against TssA1 (A1), Hcp1 and VgrG1a were used. The anti-VgrG1a antibody detects VgrG1a, VgrG1b and VgrG1c, as indicated on the left. RNA polymerase (RNAP) was monitored in both whole-cell lysates and culture supernatants using monoclonal antibody directed against its  $\beta$ -subunit. **B.** Western blot analysis showing the production of TssB1 in PAK $\Delta$ *retS*,  $\Delta$ *A1* (both carrying the pBBR plasmid) and the complemented strains  $\Delta$ *A1*+*A1* and  $\Delta$ *A1*+His<sub>6</sub>*A1*. Polyclonal antibody directed against TssB1 was used.

**A**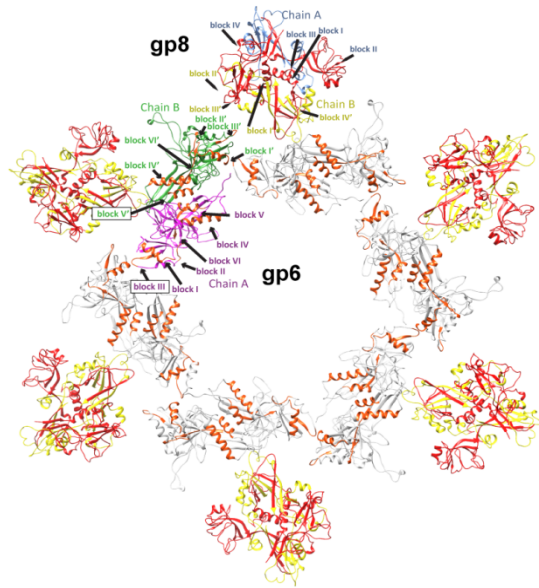**B**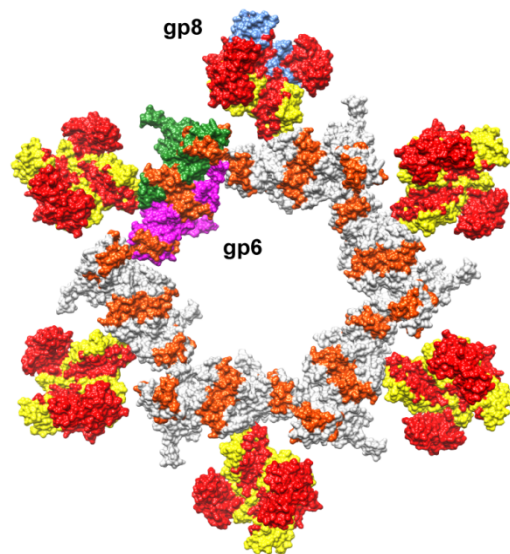

**Appendix Figure S2. The gp6/gp8 baseplate subcomplex of the T4 phage. (A), Cartoon and (B), surface representations of the dodecameric gp6 structure (PDB code 3H3W) and the structure of gp8 (PDB code 1PDM) are shown. In both representations, chain A of the gp6 dimers is shown in magenta and chain B in green and the TssA1/gp6 conserved regions are shown in orange in the gp6 ring. The TssA1/gp8 conserved blocks are shown in red in the 3D structure of gp8. The conservation is most significant in regions involved in gp8 dimerization and interaction with gp6.**
